# Supplementary material for: Formulations Based on Drug Loaded Aptamer-Conjugated Liposomes as a Viable Strategy for the Topical Treatment of Basal Cell Carcinoma—In Vitro Tests
Source: MDPI journal article supplement (doi:10.3390/pharmaceutics13060866), 2021-06-11
Supplement: s1 [file s1]

# Supplementary Materials: Formulations Based on Drug Loaded Aptamer-Conjugated Liposomes as a Viable Strategy for the Topical Treatment of Basal Cell Carcinoma—In Vitro Tests

Anca N. Cadinoiu, Delia M. Rata, Leonard I. Atanase, Cosmin T. Mihai, Simona E. Bacaita and Marcel Popa

## 1. In Vitro Evaluation of Topical Formulations Biocompatibility with Blood Components

Positive (100% lysis) and negative (0% lysis) control samples were obtained by adding equal volumes of Triton X-100 at a concentration of 2% and normal saline solution, respectively, to RBC suspension. The samples were left in the oven at 37°C for 90, 180 and 300 min. Once every 30 minutes, the samples were gently shaken. After the incubation time, the samples were centrifuged at 2000 rpm for 5 min and 1.5 mL of supernatant was incubated for 30 min at room temperature to allow hemoglobin oxidation. Oxyhemoglobin absorbance in supernatants was measured using a Nanodrop One UV-Vis Spectrophotometer at 540 nm. Hemolysis percentage of the RBC was calculated using the Equation (1):

$$\%Hemolysis = \frac{(Abs_{sample} - Abs_{negative\ control})}{(Abs_{positive\ control} - Abs_{negative\ control})} * 100 \quad (1)$$

The experiments were performed in triplicate.

## 2. In Vitro Transdermal Diffusion Assays

Figure S1 presents the 5-Fluorouracil (5-FU) permeation profiles across the artificial membrane Strat-M® from free 5-FU solution and drug-loaded liposomes over a time period of 24 h.

Figure S1 illustrates that the analyzed samples exhibits regular drug permeation during experiment. Drug's incorporation into the liposomes reduced permeation rate of 5-FU across the artificial membrane. Therefore, the drug permeability value was lower for L4 sample (about 3.06 µg/cm<sup>2</sup> of 5-FU) than that observed for 5-FU solution (about 15.36 µg/cm<sup>2</sup> 5-FU).

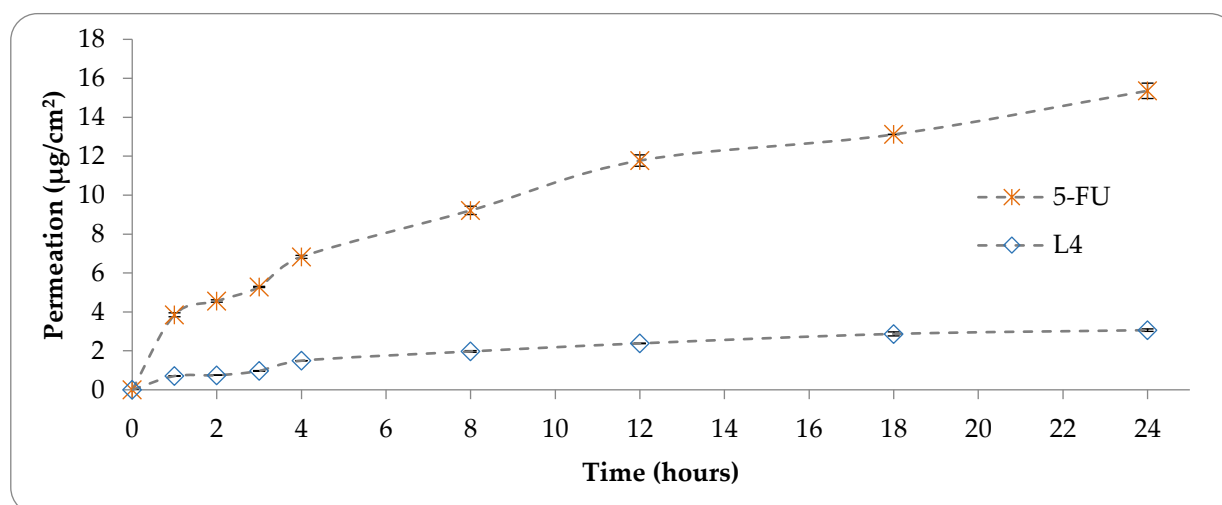

**Figure S1.** In vitro permeation profiles (µg/cm<sup>2</sup>) of 5-FU across Strat-M membrane in phosphate buffer solution (pH 7.4) from free 5-FU solution and drug-loaded liposomes L4.

### 3. In Vitro Evaluation of topical Formulations Biocompatibility with Blood Components

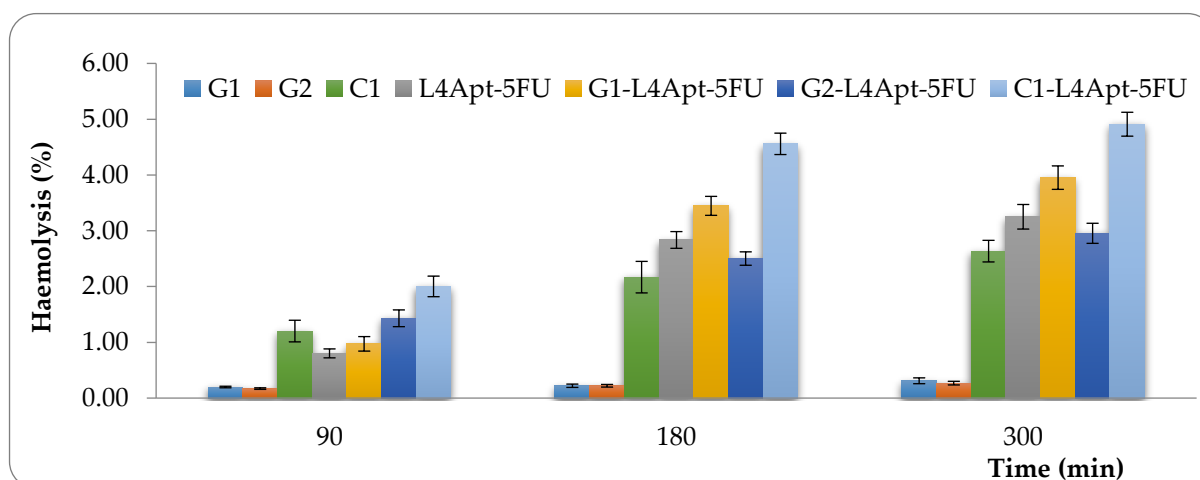

**Figure S2.** In vitro RBCs lysis of liposome and liposomes formulation loaded with 5-FU.

Where:

Aptamer-conjugated liposomes loaded with 5-FU — L4Apt-5FU

Gel formulations — G1, G2 and C1

Gel formulation containing aptamer-conjugated liposomes loaded with 5-FU — G1-L4Apt-5FU, G2-L4Apt-5FU and C1-L4Apt-5FU

### 4. Cell Viability Assessment by the MTT Method

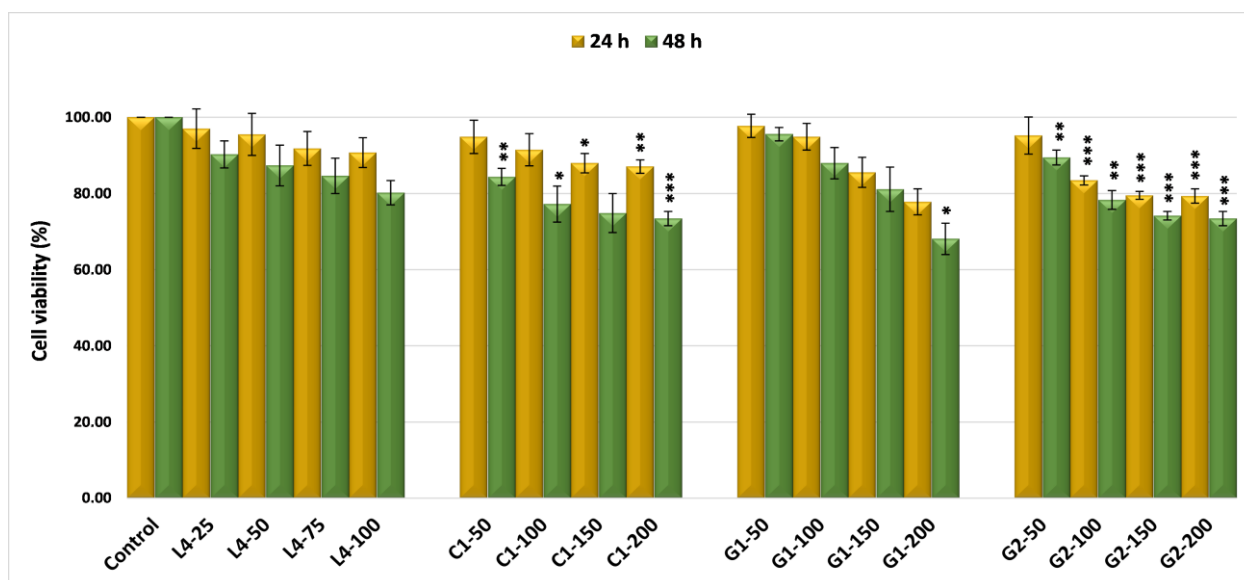

**Figure S3.** Effect of 24 and 48 h treatment, with different concentrations (µg/mL) of L4, C1, G1, and G2 formulations on the viability of TE 354.T tumor cell cultures (significance different from control: \*  $p < 0.05$ , \*\*  $p < 0.01$ , and \*\*\*  $p < 0.001$ ).
